# Supplementary material for: p53 regulates diverse tissue-specific outcomes to endogenous DNA damage in mice
Source: PubMed Central journal article supplement (PMC10957910; doi:10.1038/s41467-024-46844-1), 2024-03-21
Supplement: 41467_2024_46844_MOESM1_ESM.pdf [file 41467_2024_46844_MOESM1_ESM.pdf]

## Supplementary Information

### p53 regulates diverse tissue-specific outcomes to endogenous DNA damage in mice

Ross J. Hill<sup>1</sup>, Nazareno Bona<sup>1</sup>, Job Smink<sup>2</sup>, Hannah Webb<sup>1</sup>, Alastair Crisp<sup>1</sup>, Juan I. Garaycoechea<sup>2\*</sup>, Gerry P. Crossan<sup>1\*</sup>

<sup>1</sup> MRC Laboratory of Molecular Biology, Cambridge Biomedical Campus, Francis Crick Avenue, Cambridge, United Kingdom

<sup>2</sup> Hubrecht Institute, Royal Netherlands Academy of Arts and Sciences (KNAW), Utrecht, the Netherlands

\* Correspondence [gcrossan@mrc-lmb.cam.ac.uk](mailto:gcrossan@mrc-lmb.cam.ac.uk) or [juan.g@hubrecht.eu](mailto:juan.g@hubrecht.eu)

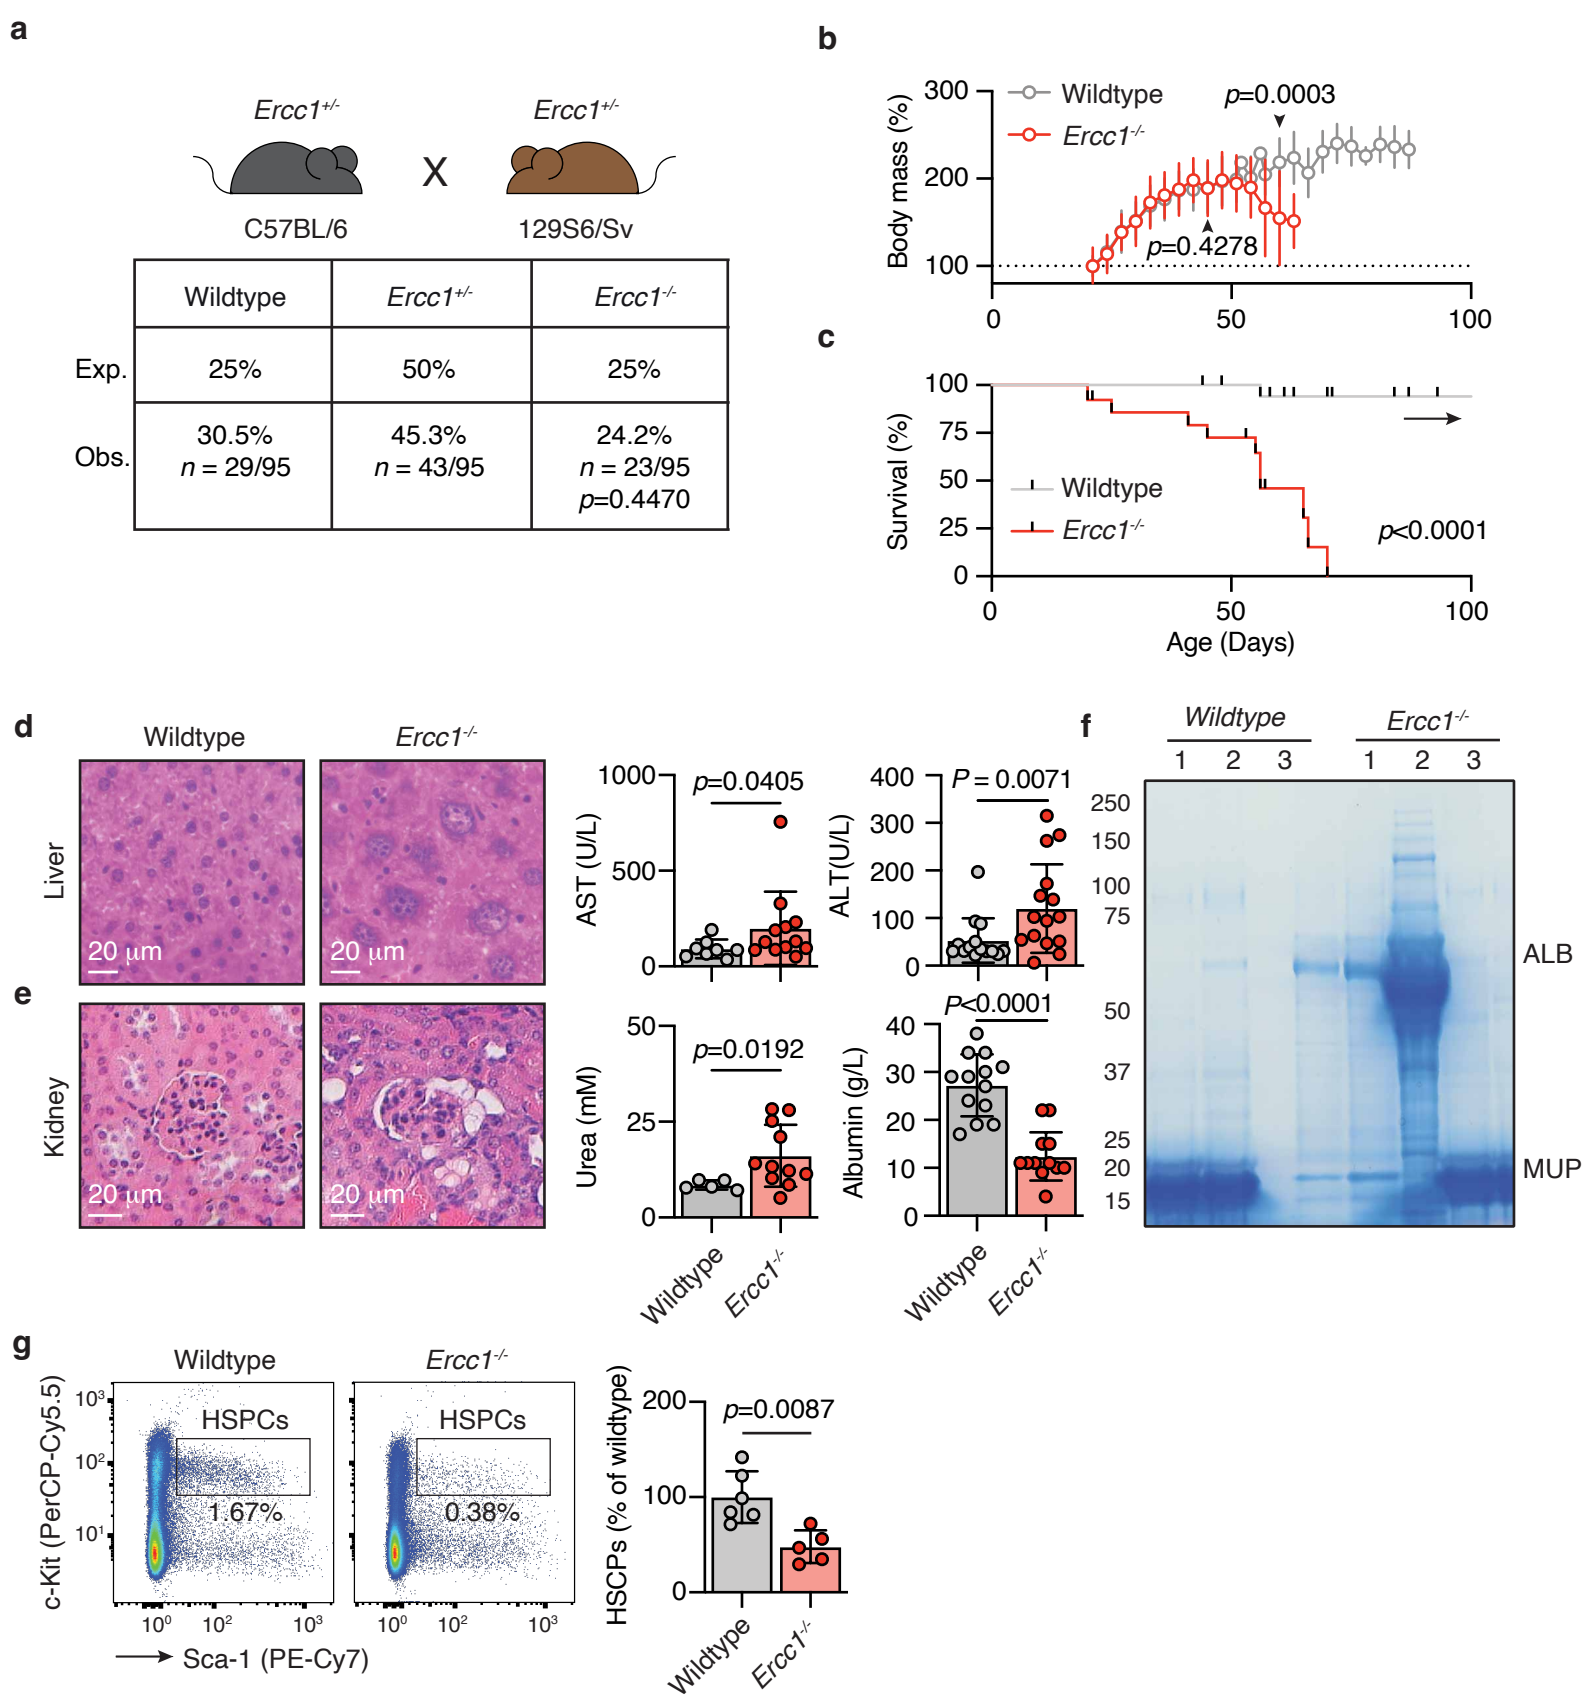

Supplementary Figure 1 - Characterization of *Ercc1<sup>-/-</sup>* allele

**Supplementary Figure 1 – Characterization of *Ercc1*<sup>-/-</sup> allele.** **a**, *Ercc1*<sup>-/-</sup> mice are observed at expected Mendelian ratios at postnatal day 21 (*p*-value calculated by one tailed Chi-square test). **b**, Growth of *Ercc1*<sup>-/-</sup> and wildtype littermate controls based on daily weights (*p*-values calculated by two-tailed Mann-Whitney *U*-test, data are mean ± s.d.; *n* = 16 Wildtype and 19 *Ercc1*<sup>-/-</sup> mice). **c**, Kaplan-Meier survival curve showing the survival of cohorts of *Ercc1*<sup>-/-</sup> and wildtype littermate controls (*p*-value calculated by one tailed Mantel-Cox test, *n* = 29 Wildtype and 23 *Ercc1*<sup>-/-</sup> mice). **d**, Representative H&E-stained sections of liver and terminal serum aspartate transaminase (AST) and alanine transaminase (ALT) levels from 6-to-8-week-old *Ercc1*<sup>-/-</sup> and control mice (*p*-value calculated by two-tailed Mann-Whitney *U*-test, data are mean ± s.d.; *n* = 8 and 12 mice, left to right.). **e**, Representative H&E-stained sections of kidney and terminal serum urea and albumin levels from 6-to-8-week-old *Ercc1*<sup>-/-</sup> and control mice (*p*-value calculated by two-tailed Mann-Whitney *U*-test, data are mean ± s.d.; *n* = 5 and 11 mice, left to right). **f**, Representative Coomassie gel of urine from wildtype or 6-to-8-week-old *Ercc1*<sup>-/-</sup> mice each lane represents one mouse, ALB-albumin, MUP-major urinary proteins **g**, Quantification of HSPCs (lineage<sup>-</sup> CD41<sup>-</sup> Sca-1<sup>+</sup> c-Kit<sup>+</sup>) by flow cytometry from wildtype and *Ercc1*<sup>-/-</sup> adult mice (*p*-value calculated by two-tailed Mann-Whitney *U*-test, data are mean ± s.d.; *n* = 6 Wildtype and 5 *Ercc1*<sup>-/-</sup> mice).

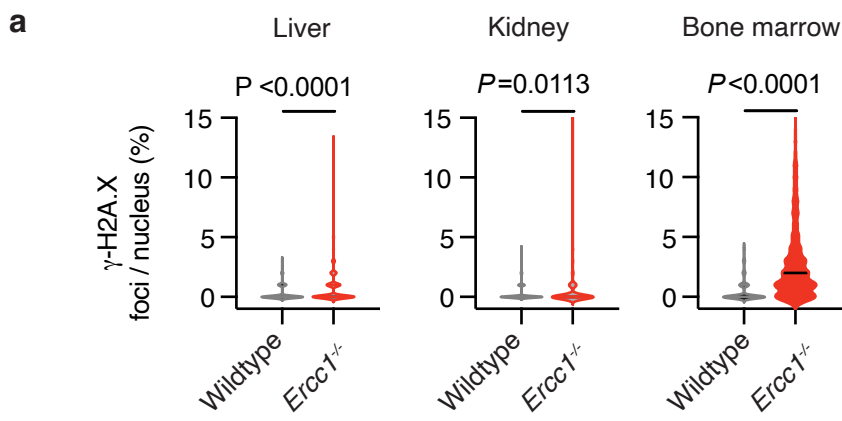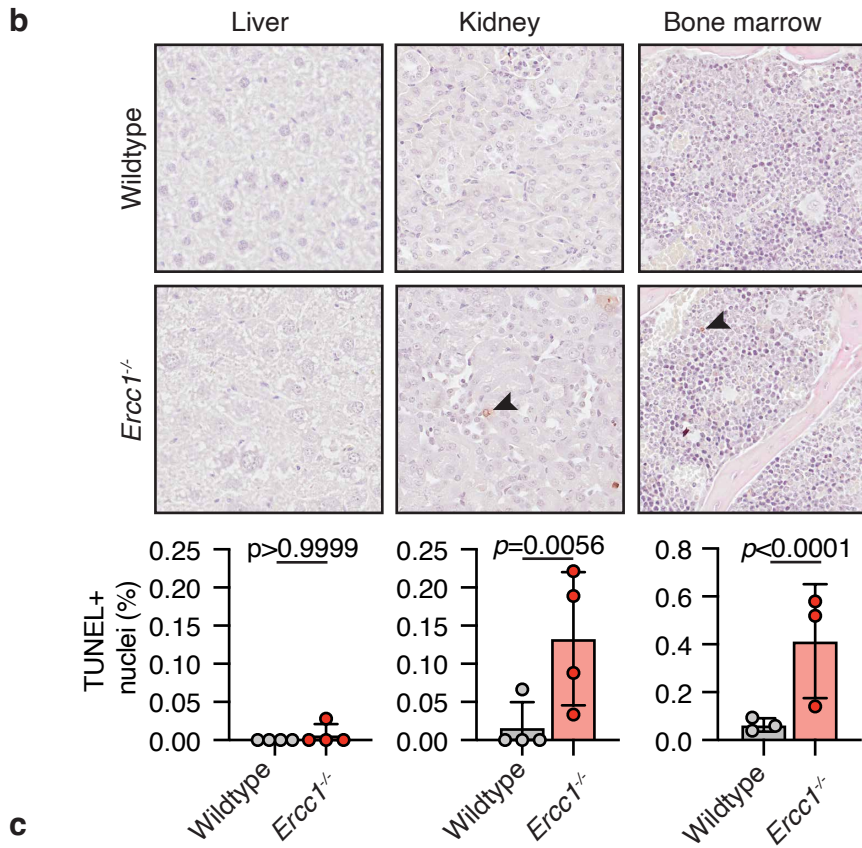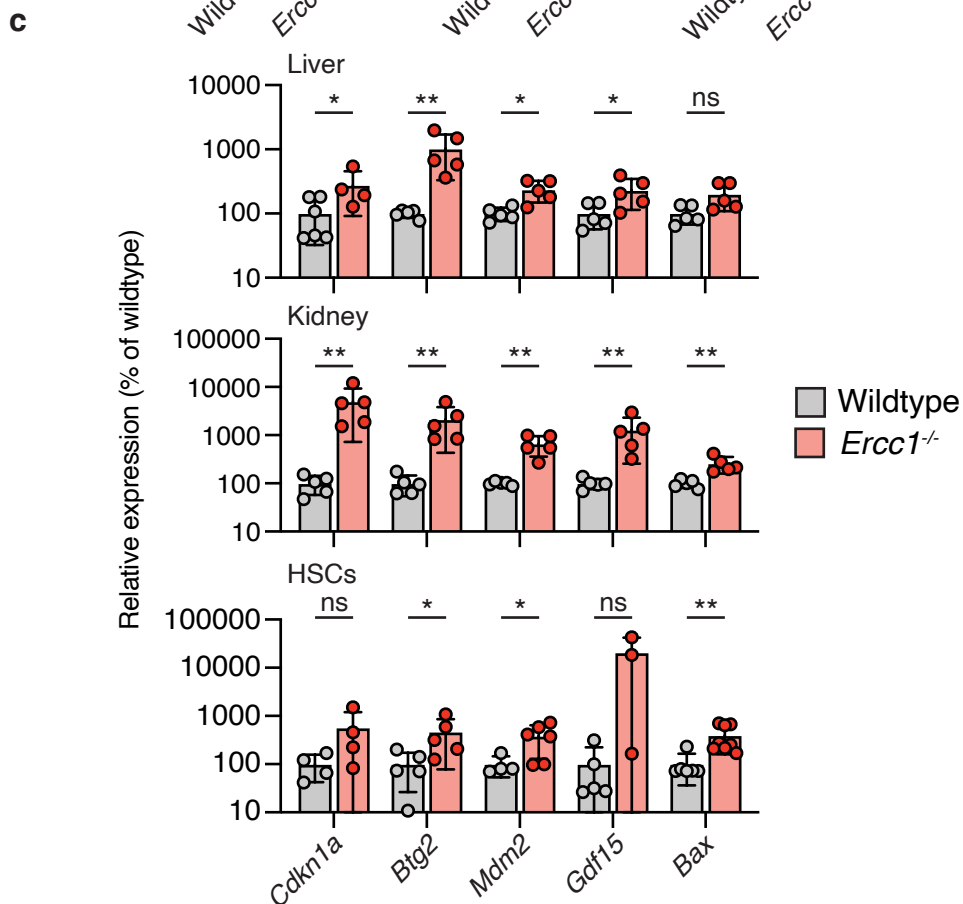

Supplementary Figure 2 - DNA damage, apoptosis, and transcriptional changes in Ercc1<sup>-/-</sup>

**Supplementary Figure 2 – RT-qPCR data in wildtype and *Ercc1*<sup>-/-</sup> mice.** **a**, Quantitative of the frequency of  $\gamma$ -H2A.X foci per nucleus. For each genotype 3 independent mice were assessed, *p*-value calculated by two-tailed t-test, data are median; *n* =327, 327, 770, 645, 299, 299, left to right **b**, Representative images of TUNEL assay in liver, kidney and bone marrow of wildtype or *Ercc1*<sup>-/-</sup> mice (arrowheads indicate TUNEL<sup>+</sup> nuclei) and quantification of the frequency of TUNEL<sup>+</sup> nuclei. *p*-value calculated by two-tailed Mann-Whitney *U*-test, data are mean  $\pm$  s.d.; *n* = 4, 4, 4, 4, 3 and 3 mice, left to right) **c**, RT-qPCR expression analysis of the p53 target genes (*Cdkn1a*, *Btg2*, *Mdm2*, *Gdf15* and *Bax*) in the liver, kidney and HSCs of wildtype and *Ercc1*<sup>-/-</sup> mice (*p*-values calculated by two-tailed Mann-Whitney *U*-test; \**p*<0.05, \*\* *p*<0.01, data are mean  $\pm$  s.d.; *n* = liver (6, 4, 5, 5, 5, 5, 5, 5, 5 and 5), Kidney (5, 5, 5, 5, 5, 5, 4, 5, 5 and 5) and HSCs (4, 4, 5, 5, 4, 6, 5, 3, 6 and 7) mice, left to right).

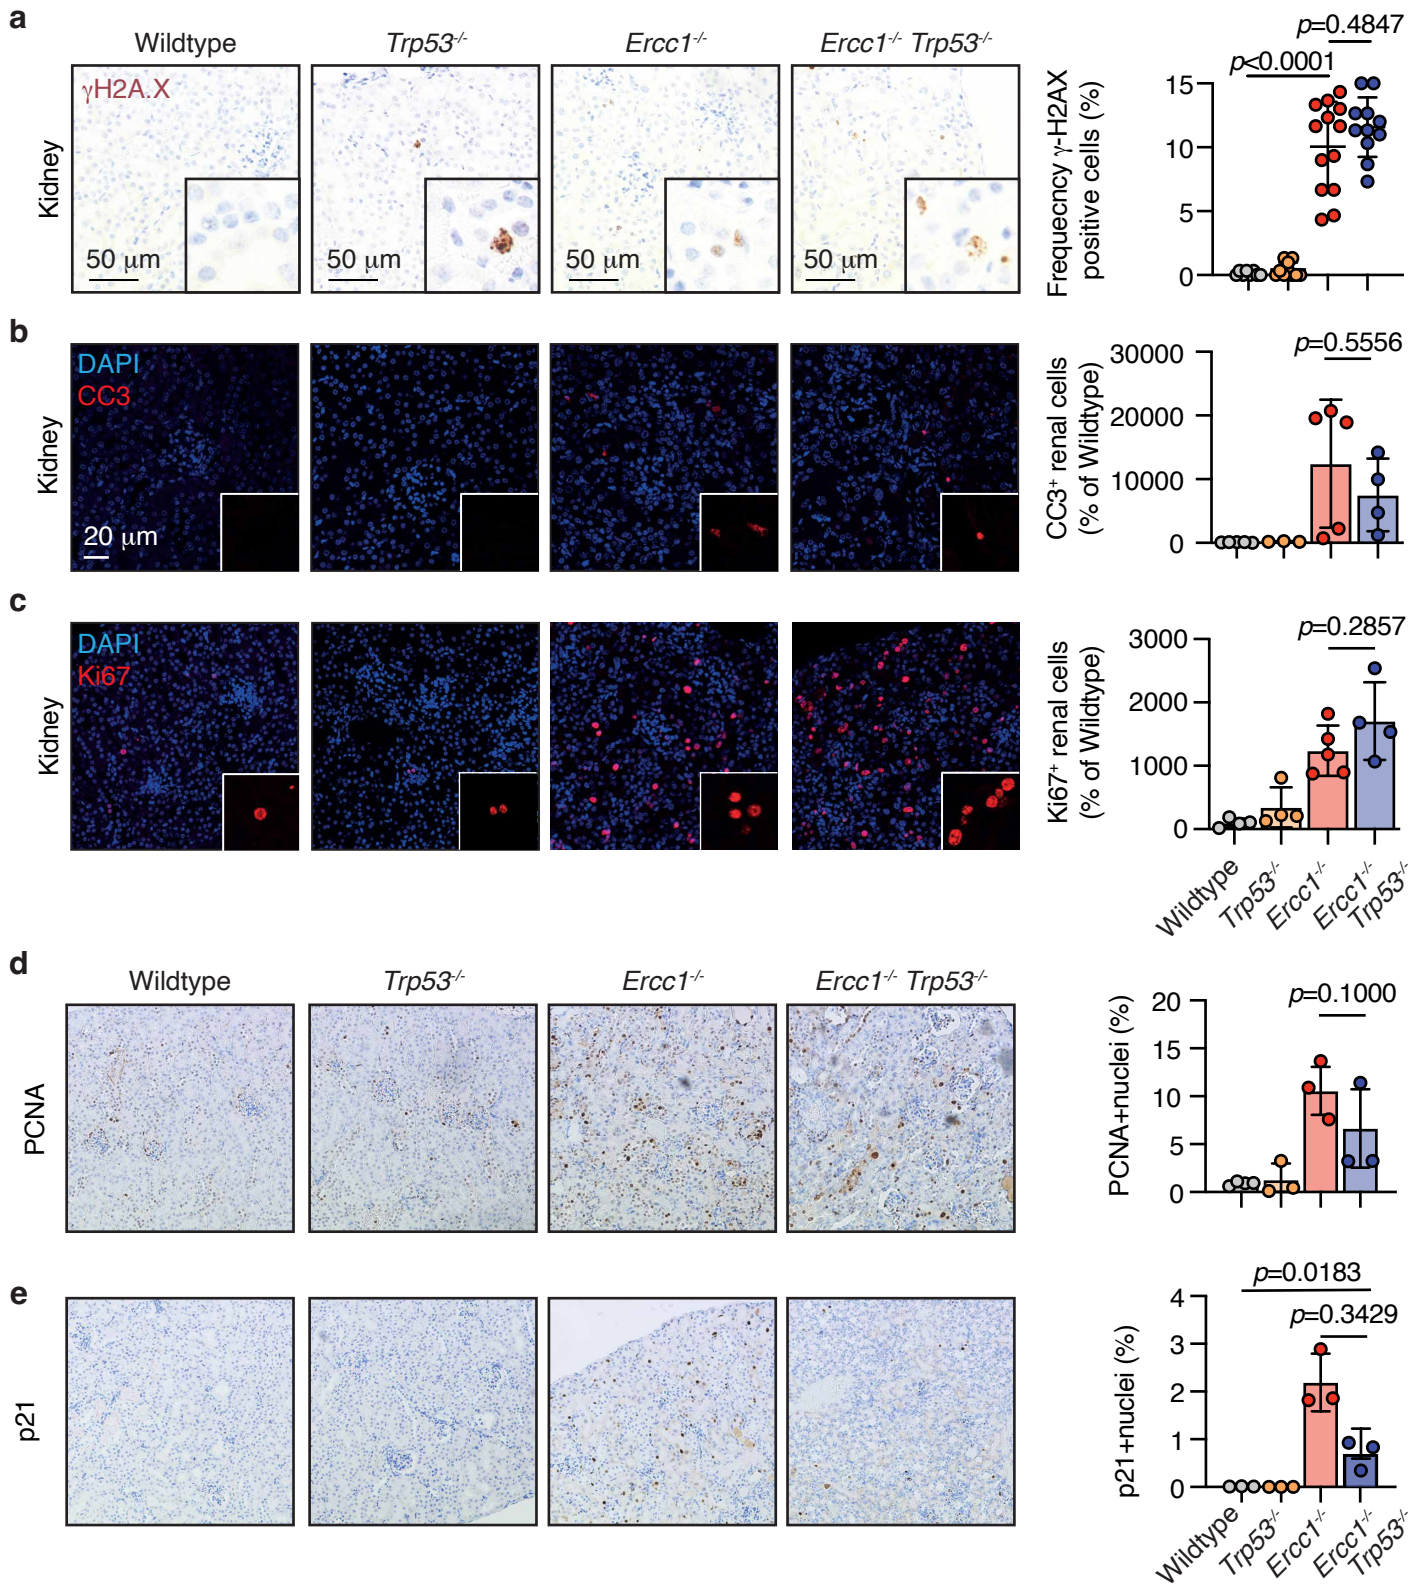

Supplementary Figure 3 - p53 is not involved in kidney pathogenesis in the absence of ERCC1

**Supplementary Figure 3 – p53 is not involved in kidney pathogenesis in the absence of ERCC1.** **a**, Representative images of  $\gamma$ -H2A.X foci in kidney sections from wildtype and *Ercc1<sup>-/-</sup> Trp53<sup>-/-</sup>* mice and quantification of the frequency of cells with >5 nuclear  $\gamma$ -H2A.X foci (*p*-values calculated by two-tailed Mann-Whitney *U*-test, data are mean  $\pm$  s.d.; each dot corresponds to individual mice. *n* = 8, 10, 13, 11 left to right) **b**, Representative immunofluorescence of cleaved caspase 3 (CC3) staining in the kidney of *Ercc1<sup>-/-</sup> Trp53<sup>-/-</sup>* and control mice and quantification of the frequency of CC3<sup>+</sup> renal cells in the kidney of *Ercc1<sup>-/-</sup> Trp53<sup>-/-</sup>* and control mice (*p*-value calculated by two-tailed Mann-Whitney *U*-test, data are mean  $\pm$  s.d.; *n* = 5, 3, 5 and 4 independent mice, left to right). **c**, Representative immunofluorescence of Ki67 staining in the kidney of 6-to-8-week-old *Ercc1<sup>-/-</sup> Trp53<sup>-/-</sup>* and control mice. **c**, Representative immunofluorescence of Ki67 staining in the kidney of *Ercc1<sup>-/-</sup> Trp53<sup>-/-</sup>* and control mice and quantification of the frequency of Ki67<sup>+</sup> renal cells in the kidney of 6-to-8-week-old *Ercc1<sup>-/-</sup> Trp53<sup>-/-</sup>* and control mice (*p*-value calculated by two-tailed Mann-Whitney *U*-test, data are mean  $\pm$  s.d.; *n* = 4, 4, 5 and 4 independent mice, left to right). **d**, Representative immunohistochemistry of PCNA staining in the kidney of *Ercc1<sup>-/-</sup> Trp53<sup>-/-</sup>* and control mice and quantification of the frequency of PCNA<sup>+</sup> renal cells in the kidney of *Ercc1<sup>-/-</sup> Trp53<sup>-/-</sup>* and control mice (*p*-value calculated by two-tailed Mann-Whitney *U*-test, data are mean  $\pm$  s.d.; *n* = 3 independent mice). **e**, Representative immunohistochemistry of p21 staining in the kidney of *Ercc1<sup>-/-</sup> Trp53<sup>-/-</sup>* and control mice and quantification of the frequency of p21<sup>+</sup> renal cells in the kidney of *Ercc1<sup>-/-</sup> Trp53<sup>-/-</sup>* and control mice (*p*-value calculated by two-tailed Mann-Whitney *U*-test, data are mean  $\pm$  s.d.; *n* = 3 independent mice).

**a**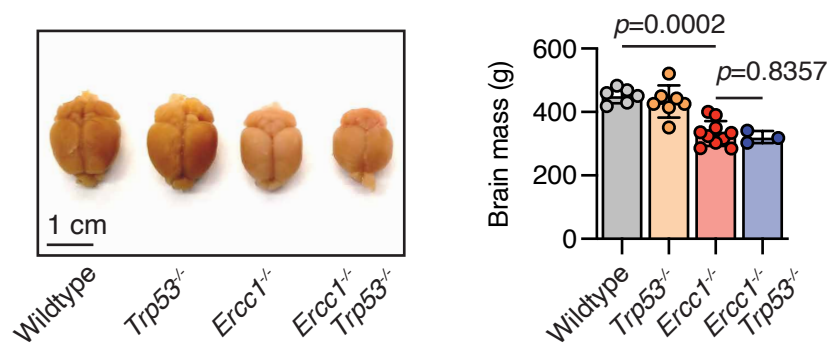**b**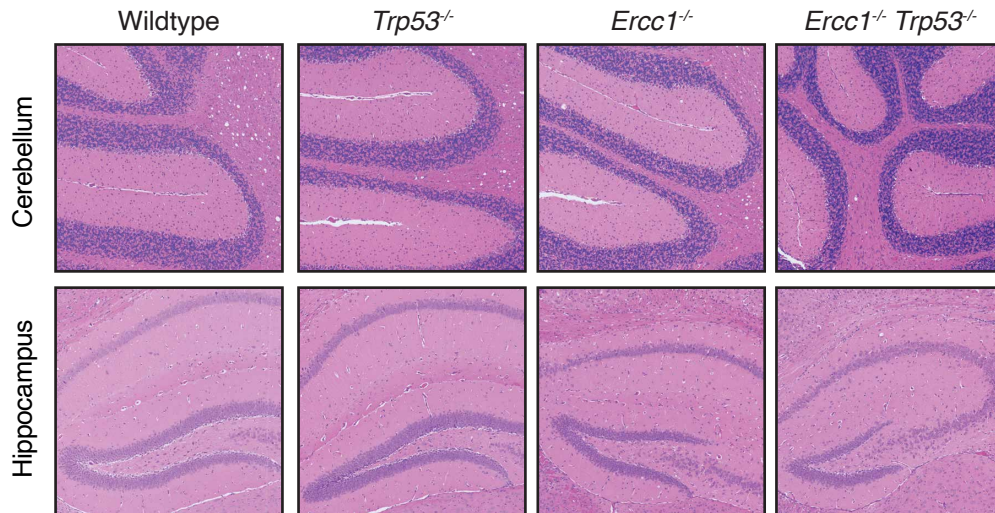**c**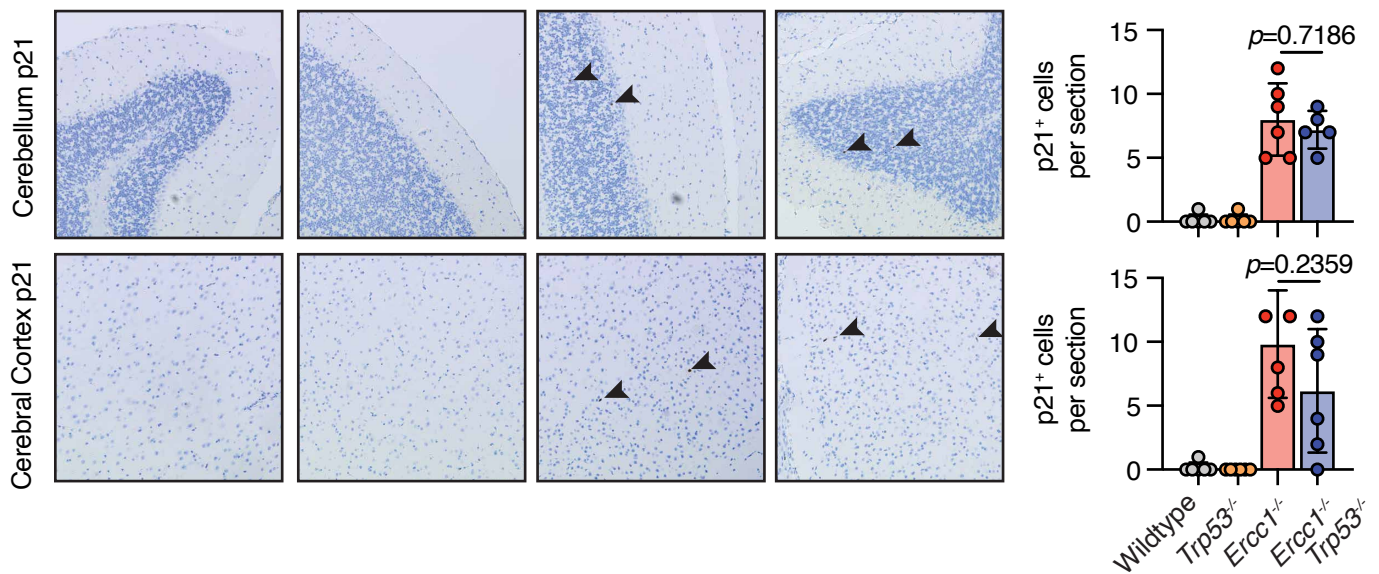**d**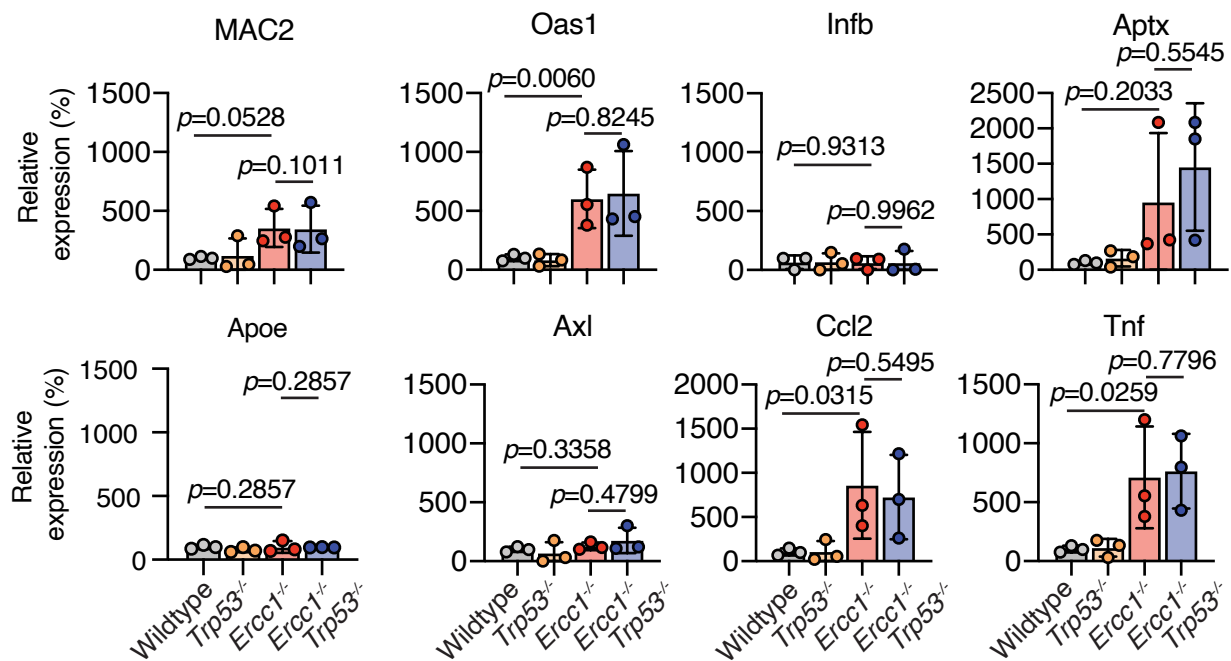**Supplementary Figure 4 - p53 does not drive neuropathology in *Ercc1*<sup>-/-</sup> mice**



**Supplementary Figure 4 – p53 does not drive neuropathology in *Ercc1*<sup>-/-</sup> mice.** **a**, Representative images of brains from age-matched adult *Ercc1*<sup>-/-</sup> *Trp53*<sup>-/-</sup> and control mice and quantification brain weight ( $p$ -values calculated by two-tailed Mann-Whitney  $U$ -test, data are mean  $\pm$  s.d.;  $n = 6$  Wildtype, 7 *Trp53*<sup>-/-</sup>, 10 *Ercc1*<sup>-/-</sup> and 3 *Ercc1*<sup>-/-</sup> *Trp53*<sup>-/-</sup> independent mice). **b**, Representative H&E-stained sections of the cerebellum (top) and hippocampus (bottom) of 6-to-8-week-old *Ercc1*<sup>-/-</sup> *Trp53*<sup>-/-</sup> and control mice. **c**, Representative immunohistochemistry of p21 staining in the brain of *Ercc1*<sup>-/-</sup> *Trp53*<sup>-/-</sup> and control mice (arrowheads indicate p21<sup>+</sup> nuclei) and quantification of the frequency of p21<sup>+</sup> cells in the brain of *Ercc1*<sup>-/-</sup> *Trp53*<sup>-/-</sup> and control mice ( $p$ -value calculated by two-tailed Mann-Whitney  $U$ -test, data are mean  $\pm$  s.d.;  $n = 3$  independent mice per genotype). **d**, RT-PCR expression analysis of inflammatory markers in the whole brain ( $p$ -values calculated by two-tailed Mann-Whitney  $U$ -test, data are mean  $\pm$  s.d,  $n = 3$  independent mice per condition).

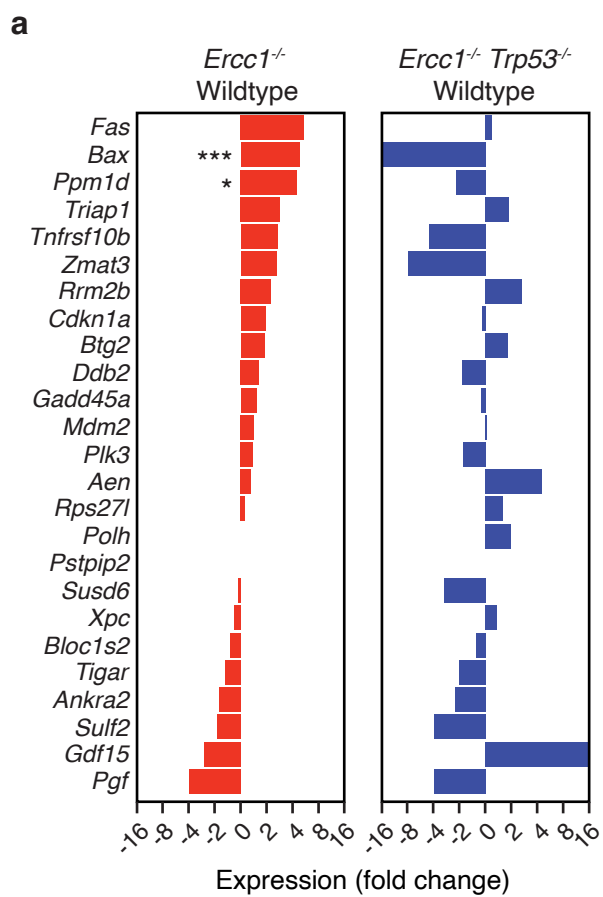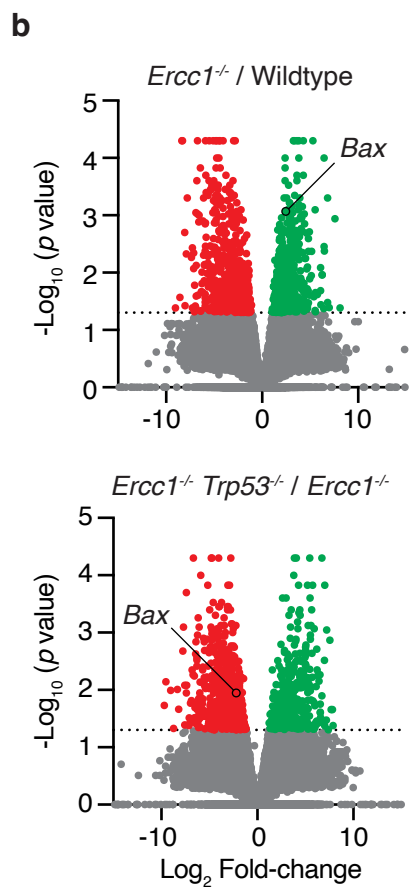

Supplementary Figure 5 - p53 deletion rescues blood cell apoptosis in *Ercc1*<sup>-/-</sup> mice

**Supplementary Figure 5 – p53 deletion rescues blood cell apoptosis in *Ercc1*<sup>-/-</sup> mice. a,** Expression analysis of a p53 signature comprising the top 25 p53 target genes in adult *Ercc1*<sup>-/-</sup> (left) and *Ercc1*<sup>-/-</sup> *Trp53*<sup>-/-</sup> (right) HSCs relative to wildtype controls ( $p$ -values calculated by two-tailed Mann-Whitney  $U$ -test; \* $p$ <0.05, \*\*  $p$ <0.01,  $p$ <0.001, data represent mean and s.d.;  $n = 3$  independent mice per genotype). **b,** Volcano plots showing the differentially expressed genes in adult HSCs from global transcriptome data; (top) *Ercc1*<sup>-/-</sup> compared to wildtype controls (bottom) *Ercc1*<sup>-/-</sup> *Trp53*<sup>-/-</sup> compared with *Ercc1*<sup>-/-</sup> controls.

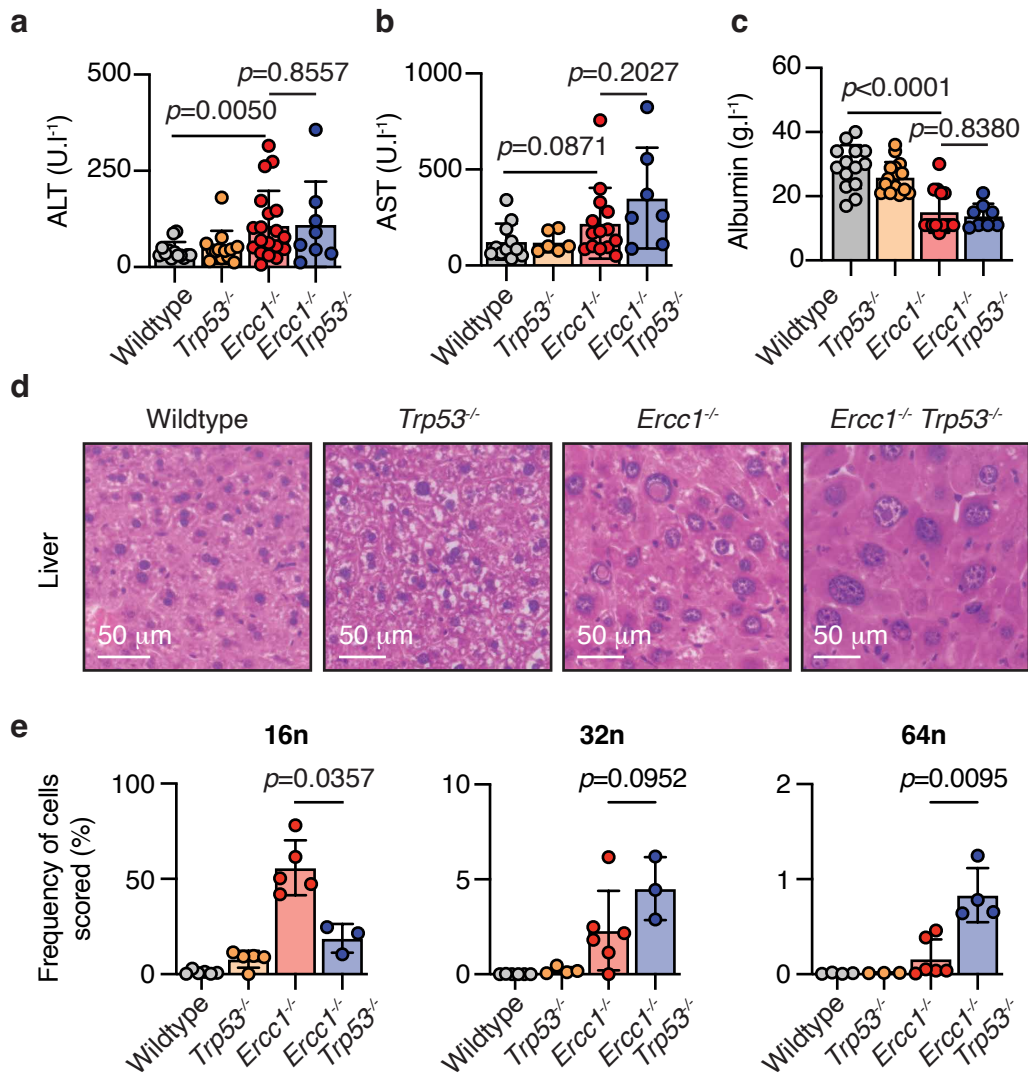

Supplementary Figure 6 - p53 limits liver polyploidisation in the absence of ERCC1 but does not protect liver function

**Supplementary Figure 6 – p53 limits liver polyploidisation in the absence of ERCC1 but does not protect liver function.** **a**, Terminal blood serum alanine transaminase (ALT) levels from *Ercc1<sup>-/-</sup> Trp53<sup>-/-</sup>* and control mice (*p*-value calculated by two-tailed Mann-Whitney *U*-test, data are mean  $\pm$  s.d.; *n* = 10, 7, 10 and 6 independent mice, left to right). **b**, Terminal blood serum aspartate transaminase (AST) levels from *Ercc1<sup>-/-</sup> Trp53<sup>-/-</sup>* and control mice (*p*-value calculated by two-tailed Mann-Whitney *U*-test, data are mean  $\pm$  s.d.; *n* = 10, 5, 10 and 6 independent mice, left to right). **c**, Terminal blood serum albumin levels from *Ercc1<sup>-/-</sup> Trp53<sup>-/-</sup>* and control mice (*p*-value calculated by two-tailed Mann-Whitney *U*-test, data are mean  $\pm$  s.d.; *n* = 9, 9, 7 and 4 independent mice, left to right). **d**, H&E-stained sections of liver from 6-to-8-week-old *Ercc1<sup>-/-</sup> Trp53<sup>-/-</sup>* and control mice. **e**, Quantification of liver cell nuclei with chromosome complements of 16n (left), 32n (centre) and 64n (right) from the liver of *Ercc1<sup>-/-</sup> Trp53<sup>-/-</sup>* and control mice by flow cytometry (*p*-values calculated by two-tailed Mann-Whitney *U*-test, data are mean  $\pm$  s.d.; *n* = 16n; 6, 5, 5 and 3, 32n; 6, 4, 6 and 3, 64n; 4, 3, 6 and 4, independent mice, left to right).

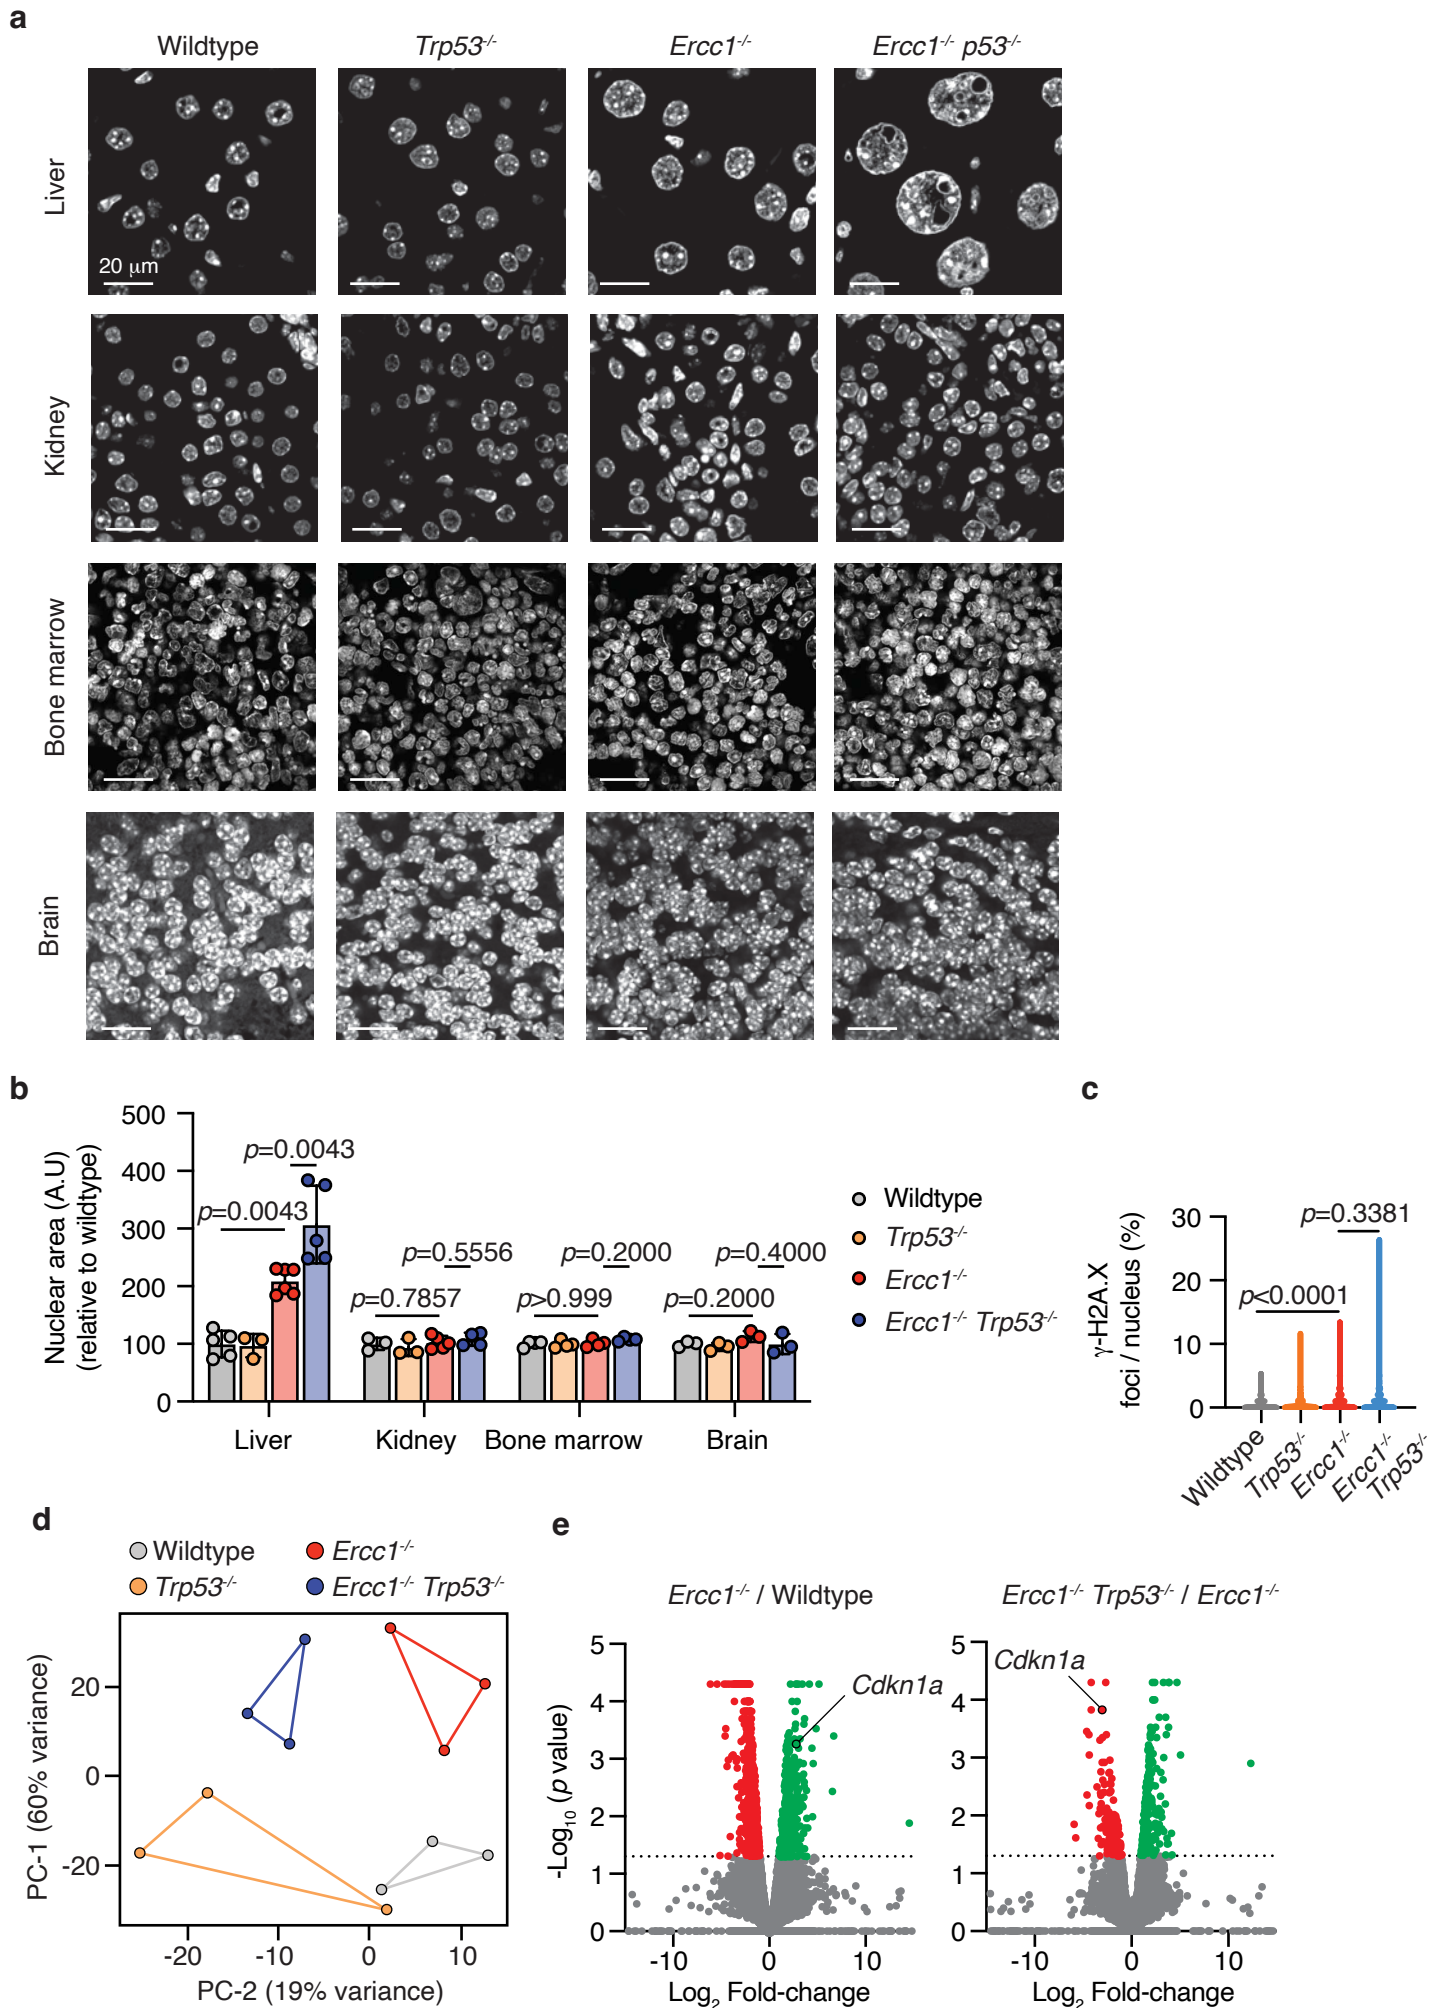

**Supplementary Figure 7 - Nuclear area in different tissues from wildtype and mutant mice and RNAseq data in hepatocytes**

**Supplementary Figure 7 – Nuclear area in different tissues from wildtype and mutant mice and RNAseq data in hepatocytes.** **a**, Representative immunofluorescence of DAPI staining in the liver, kidney, bone marrow and brain of 6-to-8-week-old *Ercc1*<sup>-/-</sup> *Trp53*<sup>-/-</sup> and control mice. **b**, Quantification of the nuclear area in the liver, kidney, bone marrow and cerebral cortex of 6-to-8-week-old *Ercc1*<sup>-/-</sup> *Trp53*<sup>-/-</sup> and control mice (*p*-value calculated by two-tailed Mann-Whitney *U*-test, data are mean ± s.d.; each dot corresponds to an independent mouse, n=5, 3, 6, 5, 3, 3, 4, 5, 4, 4, 4, 4, 3, 3, 3, 3). **c**, Quantitative of the frequency of  $\gamma$ -H2A.X foci per nucleus. For each genotype 100 nuclei were quantified in 3 mice. **d**, Volcano plots showing the differentially expressed genes in adult hepatocytes from global transcriptome data; (left) *Ercc1*<sup>-/-</sup> compared with wildtype controls, (right) *Ercc1*<sup>-/-</sup> *Trp53*<sup>-/-</sup> compared with *Ercc1*<sup>-/-</sup> controls. **e**, Principal component analysis (PCA) showing changes associated with loss of *Trp53* and/or *Ercc1* in adult hepatocytes based on global transcriptome data (data represent 3 independent mice per genotype).

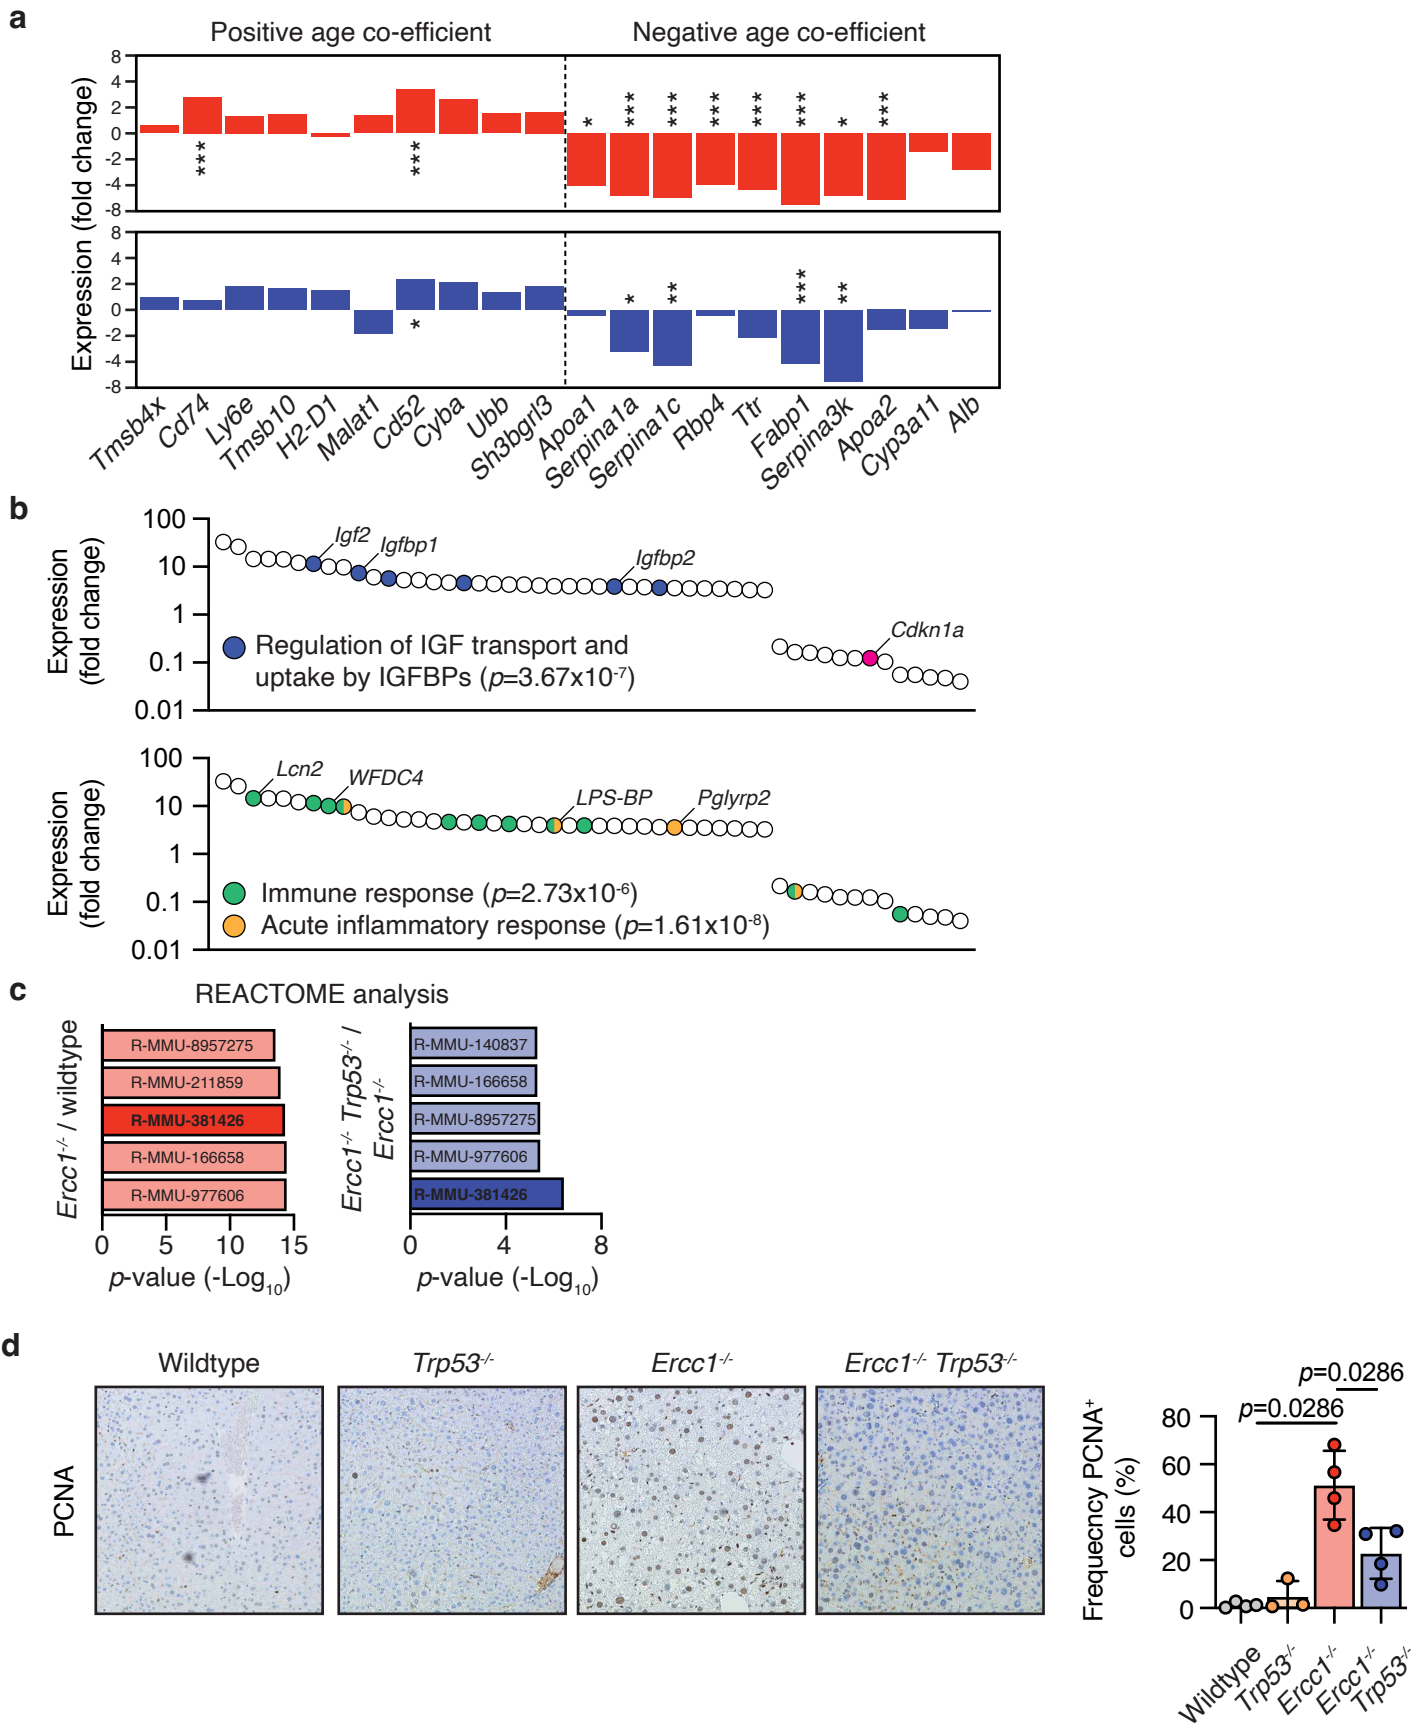

Supplementary Figure 8 - p53 loss exacerbates features of ageing in the liver of *Ercc1*<sup>-/-</sup> mice



**Supplementary Figure 8 – p53 loss exacerbates features of aging in the liver of *Ercc1*<sup>-/-</sup> mice.** **a**, Expression analysis of the Mouse Aging Cell Atlas liver aging signature (*Tabula Muris Senis*) in *Ercc1*<sup>-/-</sup> (left) and *Ercc1*<sup>-/-</sup> *Trp53*<sup>-/-</sup> (right) hepatocytes each made relative to wildtype controls from global transcriptome data (*p*-values calculated by two-tailed Mann-Whitney *U*-test; \**p*<0.05, \*\* *p*<0.01, *p*<0.001, data are mean; *n* = 3 per genotype). **b**, Representative plots of the top 50 most significantly differentially expressed genes in *Ercc1*<sup>-/-</sup> *Trp53*<sup>-/-</sup> hepatocytes relative to *Ercc1*<sup>-/-</sup> controls identifying (top) components of the “Regulation of IGF transport and uptake by IGFBNs” (bottom) factors involved in “Immune response” and “Acute inflammatory response”. **c**, Pathway enrichment using the REACTOME database of the differentially expressed genes in *Ercc1*<sup>-/-</sup> and *Ercc1*<sup>-/-</sup> *Trp53*<sup>-/-</sup> hepatocytes relative to wildtype controls from global transcriptome data (*n* = 3 per genotype). **d**, Representative immunohistochemistry of PCNA staining in the liver of *Ercc1*<sup>-/-</sup> *Trp53*<sup>-/-</sup> and control mice and quantification of the frequency of PCNA<sup>+</sup> hepatocytes in the liver of *Ercc1*<sup>-/-</sup> *Trp53*<sup>-/-</sup> and control mice (*p*-value calculated by two-tailed Mann-Whitney *U*-test, data are mean ± s.d.; each dot corresponds to an independent mouse, *n*= 4, 3, 3, 4)

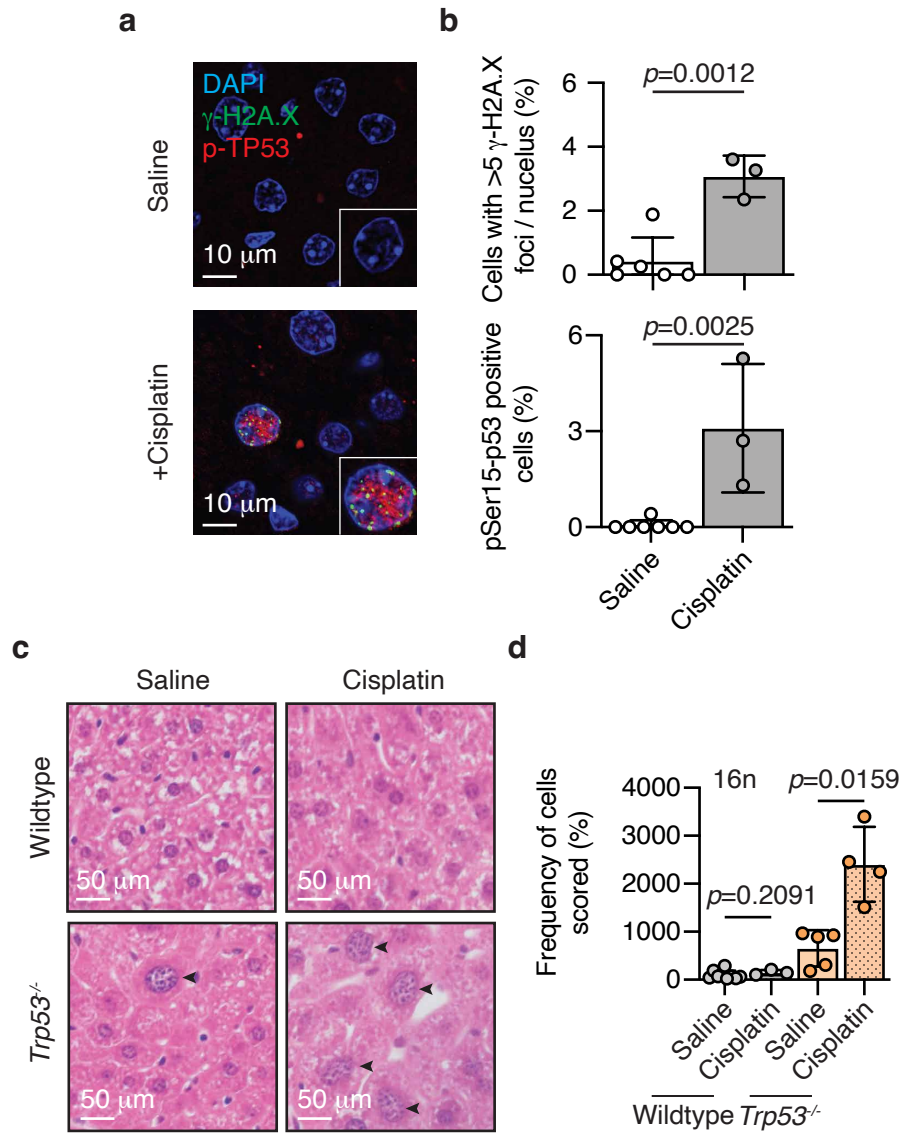

Supplementary Figure 9 - The p53-axis protects the liver from chemotherapy induced polyploidisation

**Supplementary Figure 9 – The p53-axis protects the liver from chemotherapy-induced polyploidisation.** **a**, Representative images of phosphorylated p53 (pSer15-TP53) and  $\gamma$ -H2A.X foci in the liver of wildtype mice exposed to 4 mg.kg<sup>-1</sup> cisplatin or vehicle-only control and quantification of the frequency of pSer15-TP53<sup>+</sup> cells ( $p$ -values calculated by two-tailed Mann-Whitney  $U$ -test, data are mean  $\pm$  s.d.;  $n$  = liver; 7 and 3 independent mice, left to right). **b**, Quantification of the frequency of cells with >5 nuclear  $\gamma$ -H2A.X foci ( $p$ -values calculated by two-tailed Mann-Whitney  $U$ -test, data are mean  $\pm$  s.d.;  $n$  = liver; 6 and 3, kidney; 6 and 3 independent mice, left to right); and the frequency of pSer15-TP53<sup>+</sup> cells ( $p$ -values calculated by two-tailed Mann-Whitney  $U$ -test, data are mean  $\pm$  s.d.;  $n$  = liver; 7 and 3, kidney; 7 and 3 independent mice, left to right). **c**, H&E-stained sections of liver from wildtype and *Trp53*<sup>-/-</sup> mice exposed to 4 mg.kg<sup>-1</sup> cisplatin or vehicle-only control, arrowheads indicate polyploidy hepatocyte nuclei. **d**, Quantification of liver cell nuclei with chromosome complements of 16n from the liver wildtype and *Trp53*<sup>-/-</sup> mice exposed to 4 mg.kg<sup>-1</sup> cisplatin or vehicle-only controls ( $p$ -values calculated by two-tailed Mann-Whitney  $U$ -test, data are mean  $\pm$  s.d.;  $n$  = 16n; 9, 3, 5 and 4, 32n; 9, 3, 6 and 4 independent mice, left to right).

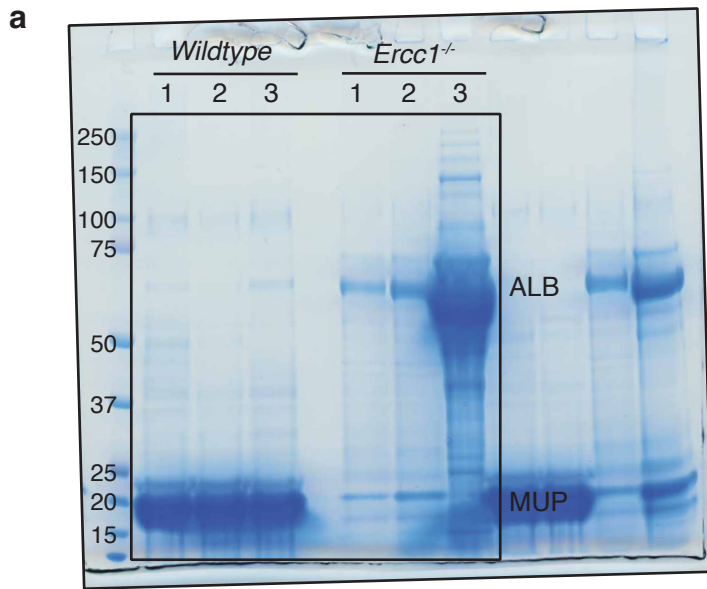

Uncropped gel from Supplementary Fig. 1f

**Supplementary Figure 10 – Uncropped gels. a**, Uncropped gel from Supplementary Figure 1f

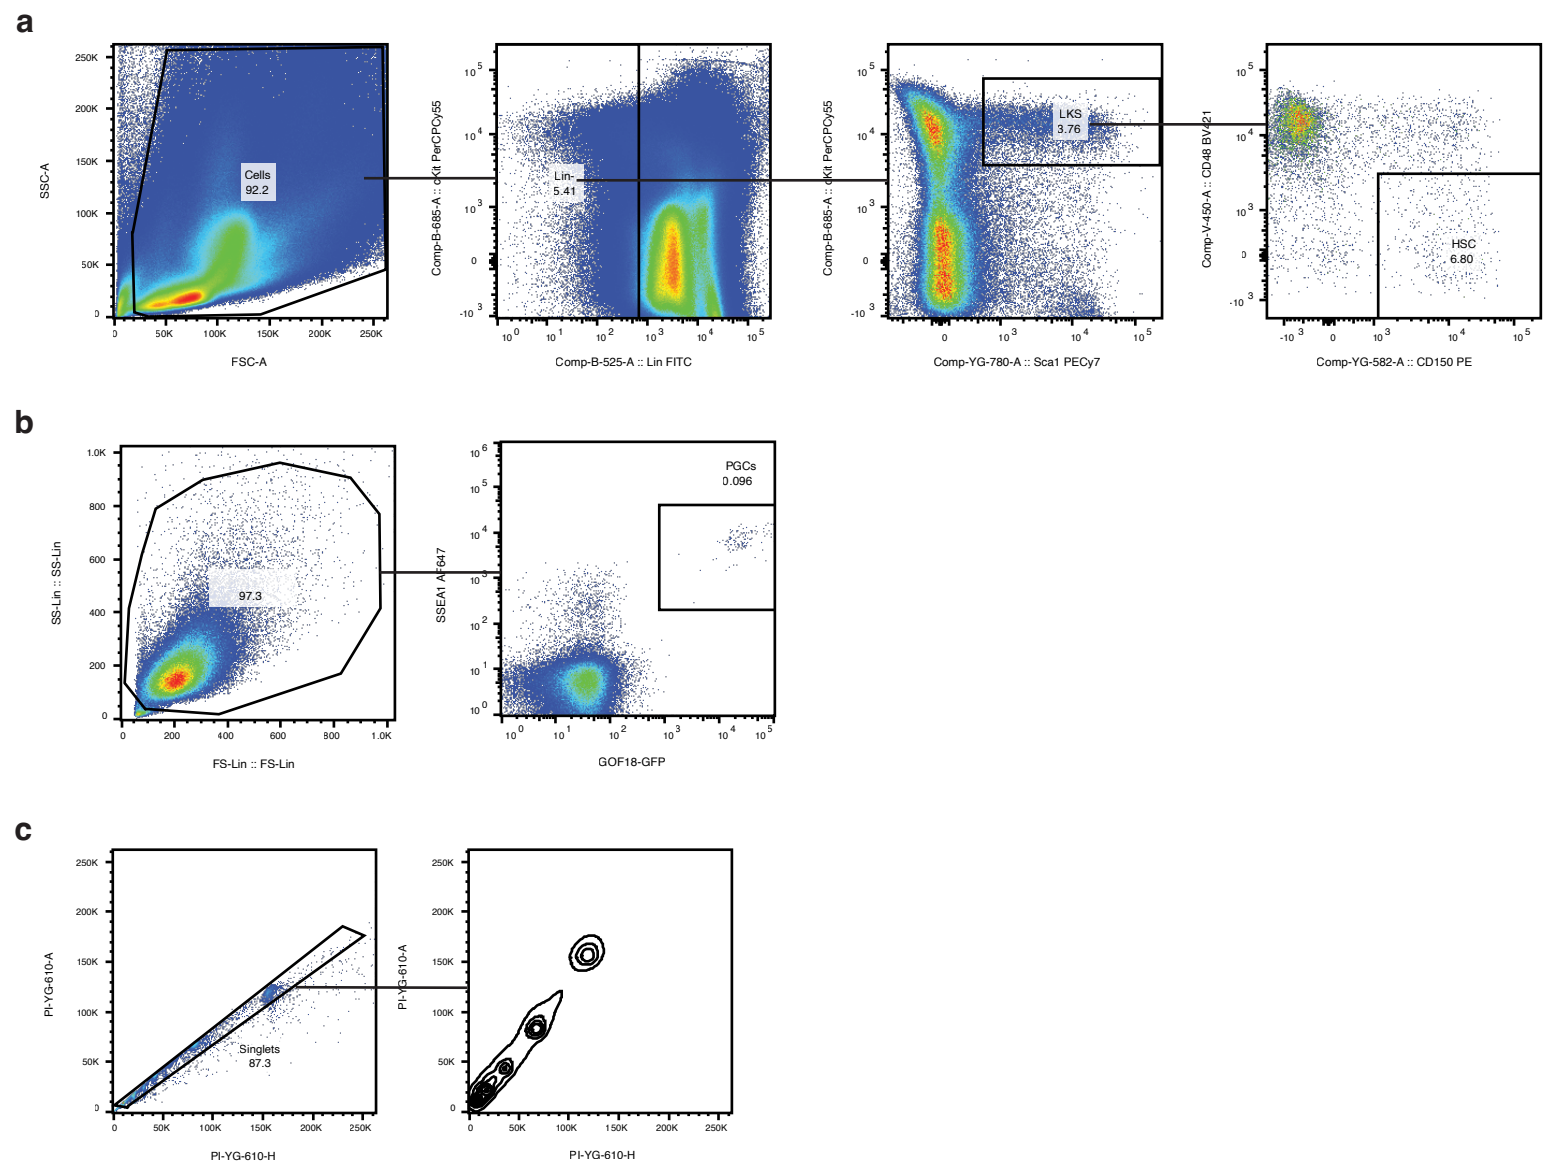

Supplementary Figure 11 - Gating Strategy

**Supplementary Figure 11 – Flow cytometry gating strategies.** **a**, Gating strategy for analysis of HSPCs (LKS) and HSCs. **b**, Gating strategy for quantification of PGCs. **c**, Gating strategy for the quantification of polyploid nuclei.
