# Supplementary material for: p53 regulates diverse tissue-specific outcomes to endogenous DNA damage in mice
Source: PubMed Central journal article supplement (PMC10957910; doi:10.1038/s41467-024-46844-1), 2024-03-21
Supplement: 41467_2024_46844_MOESM3_ESM.pdf [file 41467_2024_46844_MOESM3_ESM.pdf]

## **Description of Additional Supplementary Files**

File Name: Supplementary Data 1

Description: Table of the oligonucleotide sequences used in this study.
